# Supplementary material
Source: ML conference proceedings conference paper supplement (https://openreview.net/forum?id=s31IWg2kN5)
Supplement: supplementary_material [file attachment]

# Exploring Under Constraints with Model-Based Actor-Critic and Safety Filters

Anonymous Author(s)

Affiliation

Address

email

**Abstract:** Applying reinforcement learning (RL) to learn effective policies on physical robots without supervision remains challenging when it comes to tasks where safe exploration is critical. Constrained model-based RL (CMBRL) presents a promising approach to this problem. These methods are designed to learn constraint-adhering policies through constrained optimization approaches. Yet, such policies often fail to meet stringent safety requirements during learning and exploration. Our solution “CASE” aims to reduce the instances where constraints are breached during the learning phase. Specifically, CASE integrates techniques for optimizing constrained policies and employs planning-based safety filters as backup policies, effectively lowering constraint violations during learning and making it a more reliable option than other recent constrained model-based policy optimization methods.

**Keywords:** Model-based RL, Safe RL, Safety Filter, Exploration

## 1 Introduction

Many real-world robotic systems can be effectively modeled as constrained Markov decision processes (CMDPs) [1], particularly in contexts where safety is paramount, and robots must adhere to specific conditions while learning to accomplish tasks. In addition, CMDPs offer a structured framework for injecting inductive biases into the policy optimization process, thereby reducing the number of interactions required to learn effective policies. Thus, developing deep RL algorithms for solving CMDPs has the promise of unlocking RL’s potential across various real-world robotic applications where safety is an issue. However, applying RL to systems that must operate under constraints all the time, even as they explore and learn, remains an open challenge.

Model-free constrained policy optimization methods have primarily adapted actor-critic techniques to the constrained setting, employing Lagrangian relaxation, such as the augmented Lagrangian method, to train constrained policies. While these algorithms are appealing for their relative simplicity, they face significant challenges, particularly in terms of sensitivity to Lagrangian multipliers [2]. Moreover, model-free RL approaches for CMDPs often suffer

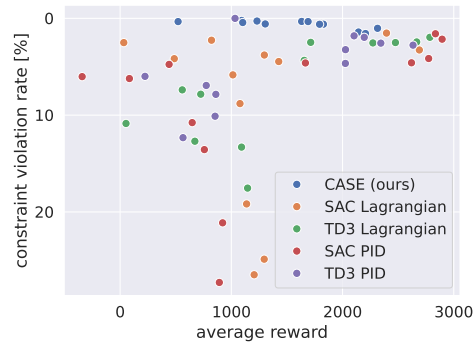

Figure 1: Results for the tasks (Ant, Walker, Hopper) with different seeds; **average rewards** represents average rewards per episode in the last 10 evaluations. **Constraint violation rate** is the average percentage of steps with constraint violations in an episode during exploration. CASE decreases constraint violations during exploration with similar task performance to other constrained RL baselines.

from high sample complexity, making them ill-suited for constrained environments where a high number of interactions during learning constrained policies leads to a high number of constraint violations as well as increased wear and tear, reducing their suitability for learning without supervision on physical robots.

Various authors have proposed applying model-based RL methods to constrained settings to tackle the challenge posed by the high sample complexity of model-free approaches. These methods fall into two main categories. The first category includes methods that improve learning efficiency and reduce constraint violations during exploration by using differentiable models [3, 4]. These models act as simulators for both learning the policy and the value function. However, despite their advantages, they often face difficulties with the instability that comes with constrained policy optimization. The second category involves methods that incorporate planning [5, 6, 7, 8] possibly alongside the primary, unconstrained policies. This approach helps in preventing constraint violations throughout the learning phase. We find that combining the ability of learned models to act as simulators for constrained policy optimization with the possibility of using learned models in lookahead planning schemes remains a largely unexplored direction. Furthermore, we find that most CMBRL methods do not consider epistemic uncertainty, which is essential in cases where the policy is exploring online and needs to reason about the effect of epistemic uncertainty on its ability to satisfy constraints.

**Our Contributions** In this work, we combine constrained model-based policy optimization with a planning-based safety filter that acts as a backup policy to minimize constraint violations during exploration. In addition, we introduce modifications to the constrained model-based policy optimization training to ensure stable training. We also modify the safety filter’s objective to consider the behavior of the constrained base policy during planning. We evaluate our method on constrained tasks from the Omnisafe benchmark [9] and show that our combination of constrained policy optimization and planning can lead to significantly reducing constraint violations during training in comparison with other CMBRL methods as seen in figure 1.

## 2 Preliminaries

### 2.1 Problem Setting

We consider a CMDP, which is defined by the tuple  $(\mathcal{S}, \mathcal{A}, p, \rho_0, r, \gamma, c, \gamma_{\text{safe}})$ .  $\mathcal{S}$  and  $\mathcal{A}$  are the state and action spaces respectively. The discount factor and the safety discount factor are represented by  $\gamma$  and  $\gamma_{\text{safe}}$ . The dynamics of the system are represented by  $p(s_{t+1} \mid s_t, a_t)$ , and the initial state distribution is represented by  $\rho_0$ . The reward function is represented by  $r(s_t, a_t)$ , and the constraint cost function is represented by  $c(s_t, a_t)$ . In this work, we consider constraint costs represented with the indicator function  $\mathcal{I}(s_t, a_t)$  where the unsafe state is represented as  $\mathcal{S}_{\text{unsafe}} = \{s_t \mid \mathcal{I}(s_t, a_t) = 1\}$  and the safe states are represented as  $\mathcal{S}_{\text{safe}} = \{s_t \mid \mathcal{I}(s_t, a_t) = 0\}$ .

The challenge in CMDPs is maximizing the performance of the agent while satisfying constraints

$$J(\pi) = \mathbb{E}_{a_t \sim \pi, s_0 \sim \rho_0} \left[ \sum_{t=0}^{\infty} \gamma^t r(s_t, a_t) \right] \quad \text{such that} \quad J^c(\pi) = \mathbb{E}_{a_t \sim \pi, s_0 \sim \rho_0} \left[ \sum_{t=0}^{\infty} \gamma_{\text{safe}}^t \mathcal{I}(s_t, a_t) \right] \leq l, \quad (1)$$

where  $l$  is a problem-specific threshold.

### 2.2 Constrained Model-based Reinforcement Learning

In constrained model-based RL, we use transition tuples in the form of  $\{s_t, a_t, r_t, c_t, s_{t+1}\}$  to learn a transition model  $p$ . The transition model can then be used in online planning as done in [10, 11], or by amortizing decision-making by offline training of a parametric policy using an actor-critic approach as in [12, 13].

Recent methods [3, 4] have shown the effectiveness of MBRL in solving CMDPs as formulated in Eq. (1). Both methods adapt previous model-based RL methods to the constrained setting;

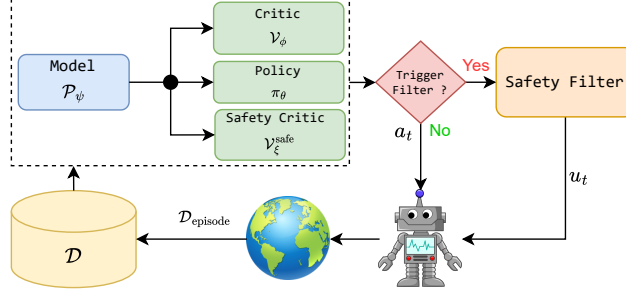

Figure 2: Overview of CASE. A dynamics model is used to pretrain policy, critic, and constraint critic. The policy is used alongside a safety filter to ensure a low rate of constraint violations during explorations.

LAMBDA [3] is based on Dreamer [12], where the RSSM model from PLANET [11] is used as a differentiable simulator for on-policy actor-critic training to learn a policy  $\pi_\theta$  and a critic  $v^\pi$ ; safeSLAC [4] is based on SLAC [14], where the model is used to fill a replay buffer that is used in an off-policy algorithm. Both methods extend their base MBRL algorithm by adding a constraint critic  $v^{\pi, \text{safe}}$  and using a Lagrangian relaxation to train a constrained policy by optimizing

$$\min_{\lambda \geq 0} \max_{\pi_\theta} \mathbb{E}_{s_0 \sim \rho_0} [J(s_0)] + \lambda \mathbb{E}_{s_0 \sim \rho_0} [J^c(s_0)]. \quad (2)$$

We follow a similar constrained model-based actor-critic (CMBAC) scheme to LAMBDA. However, we do not follow a similarly complex approach to the multiplier updates; rather, we add some minor modifications to the calculation of the value functions in constrained policy optimization to ensure the stability of the multiplier updates using gradient descent. Additionally, we avoid learning the policy  $\pi_\theta$  using a pessimistic constraint cost, which leads to learning an overtly conservative policy [4].

### 2.3 Deep Ensemble Transition Models

Due to our focus on exploration, we need a model that can provide well-calibrated epistemic uncertainties. Deep ensemble models present a straightforward approach to provide representations of the epistemic uncertainty due to their ability to provide good approximations of the Bayesian posterior predictive distribution of the neural network [15]. Thus, we rely on an ensemble of dynamic models  $\mathcal{P}_\psi = \{p_{\psi,1}, \dots, p_{\psi,B}\}$ , where each ensemble member  $p_{\psi,i}$  is a neural network that predicts the transition as a Gaussian distribution with a diagonal covariance  $p_{\psi,i}(s_{t+1} | s_t, a_t) = \mathcal{N}(s_{t+1} | \mu_{\psi,i}(s_t, a_t), \Sigma_{\psi,i})$ . We optimize each ensemble member by minimizing the negative log-likelihood

$$\mathcal{L}_{p_{\psi,i}} = - \sum_{t=1}^T \log p_{\psi,i}(s_{t+1} | s_t, a_t). \quad (3)$$

The use of ensemble-based transition models has already shown very good performance in model-based RL papers such as [16] and [10]. In deep ensemble transition models, each ensemble member  $p_{\psi,i}$  captures the aleatoric uncertainty of the ground-truth MDP. In contrast, the disagreement between the ensemble members captures the epistemic uncertainty on the learned transition function.

## 3 Approach

In CASE, we combine CMBAC with a planning-based safety filter aiming to lower constraint violation rates while exploring CMDPs. Our motivation is to leverage both the advantages of lookahead planning and the computational efficiency of actor-critic methods to explore the CMDP while keeping constraint violations to a minimum. This combination of learning and planning has been studied

in recent work [6, 17, 18], leveraging the ability of actor-critic methods to learn parametric policies and critics efficiently and compensating for the bias and limited expressiveness of an amortized parametric policy with lookahead planning using the model. We learn an ensemble transition model  $\mathcal{P}_\psi$  as discussed in section 2.3, and use model-based actor-critic by leveraging the learned model as a learned simulator for constrained on-policy actor-critic training. Online exploration is performed primarily using the constrained parametric policy; in addition, we implement a conservative planning-based safety filter to avoid violating constraints. An overview of our methods can be seen in figure 2 and algorithm 1.

### 3.1 Constrained Model-based Actor-Critic

Our approach to policy optimization is most similar to [3, 4], where CMBAC methods were shown to result in data-efficient learning of constrained policies. For the policy optimization, we learn a parameterized policy  $\pi_\theta$ . In addition, we follow [19] and learn an ensemble value function  $\mathcal{V}_\phi = \{v_{\phi_1}, \dots, v_{\phi_B}\}$ , where  $v_{\phi_i}$  are individual ensemble members, similarly, we learn an ensemble safety critic  $\mathcal{V}_\xi^{\text{safe}} = \{v_{\xi_1}^{\text{safe}}, \dots, v_{\xi_B}^{\text{safe}}\}$ .

**Learning Dynamics Model** We adapt the probabilistic ensembles discussed in 2.3 for solving CMDPs. We add predictions heads for rewards  $p(r_t|s_t)$ , constraint cost  $p(\mathcal{I}_t|s_t)$ , and termination flags  $p(d_t|s_t)$  for environments with early termination conditions. We model the reward distribution  $p(r_t|s_t)$  as a Gaussian distribution, while the binary constraint cost  $\mathcal{I}_t$  and termination flag  $d_t$  are modeled as Bernoulli distributions.

**Learning Critics** For learning of value function ensemble members, we use imagined rollouts  $\tau_{i,s_t}$  using respective transition ensemble members  $p_{\psi_i}$  and branching off real states  $s_t$ . This approach leads to the disagreement of critic ensemble members capturing the epistemic uncertainty in the transition function ensemble  $\mathcal{P}_\psi$  similar to the approach followed in [20]. We use TD( $\lambda$ ) to calculate the targets for the value function similar to Dreamer [12] and train each member in the value function ensemble on its own independent targets as done in [21]

$$\min_{\phi_i} \mathbb{E}_{s_{t'} \sim p_{\psi,i}, a_{t'} \sim \pi_\theta} \left[ \sum_{t'=t}^{t+H_v} \frac{1}{2} \|v_{\phi,i}(s_{t'}) - R^{\lambda,i}(s_{t'})\|^2 \right], \text{ where}$$

$$R^{\lambda,i}(s_t) = r_t + \gamma(1 - d_t) \left( (1 - \lambda)v_{\phi,i}(s_t) + \lambda R^{\lambda,i}(s_{t+1}) \right), \quad R_{t+H_v}^{\lambda,i} = v_{\phi,i}(s_{t+H_v}). \quad (4)$$

Similarly we learn the safety critic ensemble  $\mathcal{V}_\xi^{\text{safe}}$  using TD( $\lambda$ ) targets

$$\min_{\xi_i} \mathbb{E}_{s_{t'} \sim p_{\psi,i}, a_{t'} \sim \pi_\theta} \left[ \sum_{t'=t}^{t+H_v} \frac{1}{2} \|v_{\xi,i}^{\text{safe}}(s_{t'}) - C^{\lambda,i}(s_{t'})\|^2 \right], \text{ where}$$

$$C^{\lambda,i}(s_t) = \mathcal{I}_t + \gamma^{\text{safe}} \left( (1 - \lambda^{\text{safe}})v_{\xi,i}^{\text{safe}}(s_t) + \lambda^{\text{safe}}C^{\lambda,i}(s_{t+1}) \right), \quad C_{t+H_v}^{\lambda,i} = v_{\xi,i}^{\text{safe}}(s_{t+H_v}). \quad (5)$$

---

#### Algorithm 1 Pseudocode of CASE

---

```

Initialize parameters  $\theta, \phi, \xi, \psi$ 
for N episodes do
  for t timesteps do
    sample  $a_t$  from policy  $\pi_\theta(s_t)$ 
    if  $s_t \in \mathcal{S}_{\text{recovery}}$  according to (7) then
      Trigger filter and optimize filter objective
      in (8) resulting in plan  $\{u_t, \dots, u_{t+H}\}$ 
      Apply  $u_t$ 
    else
      Apply  $a_t$ 
    end if
  end for
  Add  $\mathcal{D}_{\text{episode}}$  to  $\mathcal{D}$ 
  update  $\mathcal{P}_\psi$  by optimizing (3)
  update  $\pi_\theta$  by optimizing (6)
  update  $\mathcal{V}_\phi$  by optimizing (4),
  update  $\mathcal{V}_\xi^{\text{safe}}$  by optimizing (5)
end for

```

---

We note that the termination flag  $d_t$  is only included in calculating the task critic targets. We do not include it in the constraint critic’s training, which would lead the constraint critic to underestimate the cost for states near termination states. We discuss this design choice further in appendix A.

**Constrained policy optimization** For solving the constrained problem in equation (1), we resort to Lagrangian relaxation by including the constraint cost term in the policy objective weighted by the Lagrangian multiplier  $\lambda$ , thus turning the problem into an unconstrained problem as in equation (2), where we solve a min-max optimization over the policy  $\pi_\theta$  and the Lagrangian multiplier  $\lambda$

$$\min_{\lambda \geq 0} \max_{\pi_\theta} \frac{1}{1 + \lambda} \mathbb{E}_{a_{t'} \sim \pi, s_t \sim \mathcal{S}_{\text{safe}}, s_{t'} \sim \mathcal{P}_\psi} \left[ R^\lambda(s_{t+k}) + \lambda C^\lambda(s_{t+k}) \mid s_t \right], \quad (6)$$

where  $R^\lambda$  and  $C^\lambda$  are the means over the TD( $\lambda$ ) returns from the different ensemble members  $R^{\lambda,i}$  and  $C^{\lambda,i}$  for the rewards and the constraint costs respectively. Designing stable update rules for Lagrangian multipliers is a challenging task in the model-based setting, as using biased model rollouts for updating the multipliers can lead to a rapid increase in their magnitudes, thus derailing training. Furthermore, model rollouts in MBRL normally use observations from the replay buffer as starting states, which can lead to the multipliers being updated to reflect the behavior of the policy used to collect the data rather than the optimized policy  $\pi_\theta$ . In [3], a complicated optimization scheme is used to decelerate the updates of the multipliers. In [4], the multipliers are updated solely using real online rollouts, presumably to avoid inaccuracies in the model from causing erroneous multiplier updates. We follow a more straightforward scheme and update the multipliers using stochastic gradient descent with no additional heuristics.

Our changes center around the calculation of the policy’s objective and are highlighted in objective (6) in cyan. We only use constraint-satisfying states  $\mathcal{S}_{\text{safe}}$  as initial states for our rollouts and only include the tail of the rollouts in the calculation of the terms in the objective, thus avoiding situations where the agent is already doomed but starts in a safe state. Thus giving the policy enough time to steer the system away from constraint-violating regions. Over time, these changes decelerate the increase in the multipliers and prevent them from exploding in value. In addition, we normalize the whole objective by a factor of  $1 + \lambda$ , which helps keep the absolute value of the loss in the same scale as the multiplier  $\lambda$  increases in value similar to [2].

### 3.2 Exploration with Safety Filter

Our aim is to enable safer online exploration. Thus, we do not use conservatism to prevent the policy from exploring online as in [22, 23, 3], which would lead the policy to learn an overtly conservative behavior. In contrast, we rely on a conservative safety filter MPC as a backup policy that intervenes to prevent constraint violation, guided by the critic.

**Trigger** To trigger the filter, we rely on the ensemble transition model and use it to roll out the learned policy  $\pi_\theta$  for horizon  $H^{\text{filter}}$  starting from the current state  $s_t$ , generating separate imagined trajectories  $\{(s_{t'}^i, a_{t'}^i)\}_t^{t+H^{\text{filter}}}$  using each member  $p_{\theta,i}$ . We use the worst-case value of the ensemble safety critic  $\mathcal{V}_{\text{max}}^{\text{safe}} = \max_{s_{t'} \in \mathcal{P}_\psi} \mathcal{V}^{\text{safe}}(s_{t'})$  to define a pessimistic recovery set

$$\mathcal{S}_{\text{recovery}} = \{(s_t) \in \mathcal{S} : \mathcal{V}_{\text{max}}^{\text{safe}}(s_{t'}^i) \geq \epsilon_{\text{safe}}\}, \quad (7)$$

where  $\mathcal{V}_{\text{max}}^{\text{safe}}$  is the maximum prediction of the ensemble critic across the lookahead trajectories.

Our pessimistic formulation of the objective and the trigger of the safety filter consider the epistemic uncertainty inherent in the exploration task, where the filter is more likely to be triggered in situations with high epistemic uncertainty due to the effect of considering the worst case prediction of the ensemble safety critic.

We roll out separate trajectories starting from current state  $s_t$  with each separate transition ensemble member  $p_{\psi,i}$  and evaluate the states  $s_{t'}^i$  in each trajectory with its respective safety critic  $v_{\xi,i}$ . The state  $s_t$  is considered part of  $\mathcal{S}_{\text{recovery}}$  in case the worst case prediction of  $\mathcal{V}^{\text{safe}}$  of the imagined trajectories starting from  $s_t$  exceeds the threshold  $\epsilon_{\text{safe}}$ .

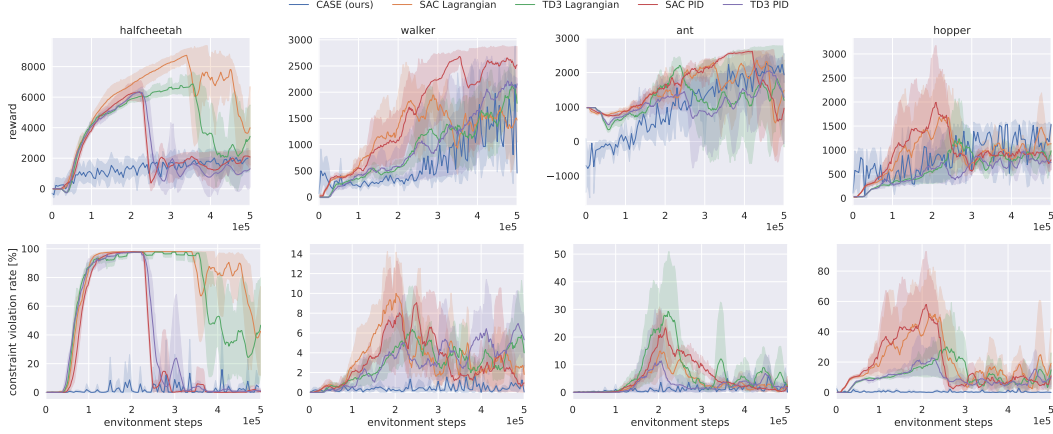

Figure 3: Performance of CASE compared to other constrained RL methods on constrained environments from the Omnisafe benchmark. We find that constraint violation rates during exploration are reduced significantly while maintaining competitive task performance in comparison with other constrained RL methods..

192 **Optimization** The safety filter used in this paper solves the optimization problem

$$\min_{u_t \dots u_{t+m}} \mathbb{E}_{\substack{s_{t+1} \dots s_{t+m} \sim \mathcal{P}_\psi(\cdot | s_t', u_{t'}) \\ s_{t+m+1} \dots s_{t+H} \sim \mathcal{P}_\psi(\cdot | s_t', \pi_\theta(s_t'))}} \left[ \sum_{t'=t}^{t+H_{\text{filter}}} \mathcal{V}_{\max}^{\text{safe}}(s_{t'}) \right]. \quad (8)$$

193 This MPC-filtering approach is similar to the recovery RL method [7], which minimizes the safety  
 194 critic along the lookahead horizon, thus enabling a longer lookahead at a reduced computational  
 195 cost. In addition, we use pessimism in triggering the filtering and optimizing its objective. Thus  
 196 taking epistemic uncertainty into consideration. Furthermore, our objective includes rollouts from  
 197 the base policy  $\pi_\theta$  in the objective, thus encouraging the MPC to drive the systems to regions of the  
 198 state space where the base policy is predicted to keep the system safe. We optimize the objective in  
 199 (8) using gradient descent where we optimize the whole term for the actions  $\{u_t, \dots, u_{t+m}\}$ .

## 200 4 Results

### 201 4.1 Experimental Setup

202 We compare our method with model-free baselines from the Omnisafe benchmarking suite [9]. For  
 203 benchmarking, we use constrained velocity control tasks, where the goal is to solve locomotion  
 204 tasks while maintaining the system below a maximum velocity. We choose different constrained  
 205 RL baselines based on TD3 [24] and SAC [25]. We first compare the performance of CASE with  
 206 the model-free baselines SAC-Lagrangian and TD3-Lagrangian, which extend SAC and TD3 with  
 207 a constrained policy optimization scheme using Lagrangian relaxation. In addition, we compare  
 208 CASE to SAC-PID and TD3-PID, which use the Lagrange multipliers updating scheme presented  
 209 in [2]. We run each method on four seeds and show the mean and the 95% confidence interval  
 210 performance in figure 3. We explain our experimental setup and hyperparameters in more detail in  
 211 appendix B.

### 212 4.2 Comparison to Model-free Baselines

213 Our results shown in figure 3 show that combining CMBAC and planning significantly decreases the  
 214 constraint violation rate during exploration, where the planning compensates for imperfections in the  
 215 parametric policy  $\pi_\theta$ , which amortizes decision-making and has limited expressiveness, leading to  
 216 situations where the behavior of  $\pi_\theta$  might lead to constraint violations. In planning, on the other



hand, we minimize the planner’s objective for each situation separately, compensating for such imperfections in  $\pi_\theta$  and instabilities in constrained policy optimization. We further discuss the impact of the individual modules in CASE and other design choices in appendix A. Although CASE shows a more constraint-adhering exploration behavior than our baselines, it is slower to reach the task performance of the baselines due to the restrictions posed by the pessimistic safety filter.

The baselines learn a safe behavior eventually; however, as constrained policy optimization tends to have instabilities during training, they have high rates of constraint violation during exploration. This is compounded by the implementation in Omnisafe, which only starts updating the Lagrange multipliers after 100 warm-up epochs, corresponding to 200k environment steps. This initial warm-up phase ensures the off-policy methods have enough variety in the replay buffer. In cases where the robot needs to learn in the wild, such exploration behavior might not be acceptable.

The results from our experiments put into question the suitability of the model-free method for safe exploration tasks. Although model-free methods might have some advantages in their asymptotic performance in comparison to model-based methods [10], they lack the ability of model-based methods to do look-ahead controlling and deciding online to avoid actions where the robot might be uncertain or that might be deemed to be possibly dangerous. Making model-based methods more suitable candidates for learning on physical robots, especially when the robot needs to explore under certain restrictions.

### 4.3 Runtime

Although using a lookahead planner as a safety filter helps reduce the constraint violation rates of the reactive parametric base policy, this comes at the cost of computational efficiency. The safety filter involves an online optimizer that solves the optimization problem in objective (8). We compare the frequency of the filter across the different environments in figure 4, and we find that the filter performs around 50 Hz in all environments. Looking at other methods combining actor-critic methods and planning, we find that TD-MPC [17], which does not consider the constrained setting, performs similarly to our method in runtime with about 50 Hz for the default setting. LOOP [6], which also explores CMDPs among other settings, reports a lower frequency 14.3 Hz. Generally, the low frequency of planning-based methods represents the biggest disadvantage compared to methods leveraging only parametric policies for decision-making.

## 5 Related Work

**Constrained model-based reinforcement learning** Different RL methods have been introduced targeting CMDPs. The most common variants are papers leveraging the augmented Lagrangian method for learning constrained policies. CPO [26] extended TRPO to CMDP, and building on that work [27] combined the Lagrangian method with PPO to learn constrained policy. The use of an on-policy method rendered the method unsuitable for learning in the real world, where sample efficiency is essential. In [28], the authors implemented a similar approach but replaced the on-policy algorithm with an off-policy approach to reduce sample complexity. Saute RL [29] provides an alternative to using Lagrangian relaxation for solving CMDPs by using state space augmentation. Different papers proposed MBRL methods combining learned models with constrained policy optimization. In [3], the authors use a Bayesian approximation of an RSSM [11] as a model. The posterior of the transition is used to learn an optimistic objective regarding the rewards but pessimistic regarding the constraint cost. A similar approach was introduced in [4] where the authors extend SLAC [14] to the constrained setting. Concurrent with

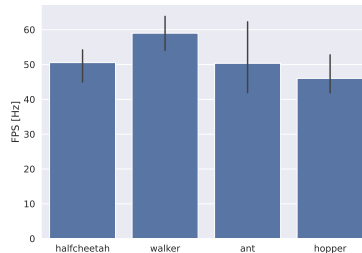

Figure 4: Average runtime for CASE. We find that despite the on-line computations, we maintain a reasonable FPS that makes CASE feasible to use in physical systems.

our work, safeDreamer proposes combining planning with CMBAC. However, safeDreamer differs in not leveraging the planner as a backup policy as is the case in CASE. Further, safeDreamer does not take the epistemic uncertainty into decision-making, as proposed in our method.

**Safety filters** Learning a policy to satisfy constraints and, at the same time, maximize the agent’s utility can be a challenging task. As a result, multiple methods have attempted to circumvent this problem by introducing backup policies  $\pi^{\text{safe}}(s_t)$  that minimize constraint costs in addition to a task-reward maximizing base policy  $\pi(s_t)$ . Model-free methods that use a backup mechanism [7, 30] generally use an off-policy critic to trigger the intervention mechanism. Critics tend to be sensitive to out-of-distribution data and, in general, hard to learn. The two-policy setup is also investigated in [31], where the authors improve on the safety layers approach [32] by replacing the layers with a separate parametric policy that allows them to handle more complicated constraints.

The predictive safety filter paper [8] discusses the idea of using an MPC wrapper to a base policy that prevents the base policy from violating constraints during learning by making assumptions about the model and the system dynamics as well as about the availability of a controller that can keep the system in the safe terminal state, allowing for guarantees on constraint satisfaction. Recovery RL [7] is closer to our approach, where the authors deploy a safety critic to design an intervention mechanism that prevents constraint violation. However, the paper does not explore using the model in concurrence to train a constrained policy, as we discuss in our method. In [33], a control barrier function is used in learning a safe policy. However, their method is only applicable for control affine systems. SAILR [34] provides an advantage-based intervention mechanism and derives performance bounds under the assumption of having an MDP with an absorbing state. However, their model-based experiments seem to be based on engineered models.

**Online planning using offline learned functions** Combining online planning with offline learned functions was shown to be effective in multiple papers [18, 6, 17]. The use of online planning suffers less from bias in comparison with parameterized policies. Also, offline-learned functions enable the planner to reason beyond its planning horizon when combined with a learned value function or provide efficient initialization to them as done when combined with a parameterized policy. The idea of planning using offline learned functions was shown to improve on parametric policies in [18], and performance bounds were derived that show the benefits of using a planner in combination with a value function. However, the methods and the bounds introduced all used an unbiased dynamics model. In [6], these insights were extended to biased models, where they discussed the benefits of combining planning with offline learned functions even with a biased dynamics model.

## 6 Conclusions and Limitations

We present a method that combines constrained model-based policy optimization with a pessimistic planning-based safety filter for exploration in CMDPs with the aim of facilitating the learning of effective policies entirely on physical robots. We find that leveraging the ability of model-based methods to function as a simulator for on-policy actor-critic methods and being used in lookahead-control schemes and thus combining the advantages of model-based actor-critic with low-bias properties of planning can lead to a significant reduction in constraint violation rates in comparison with model-free methods.

**Limitations** The main limitation of our method lies in the inability to guarantee constraint satisfaction. Such guarantees would involve making assumptions on the target system, such as the smoothness of the dynamics and the availability of a safe terminal set, which might not be satisfied in many target systems of interest. Although our method leads to less constraint violation than the baselines during exploration, online planning can be computationally expensive. Furthermore, our design for the learned transition model limits our method to fully observable systems, which we aim to rectify in future work by leveraging models that can learn the dynamics of partially observable systems.



## References

- [1] E. Altman. *Constrained Markov Decision Processes*, volume 7. CRC Press, 1999.
- [2] A. Stooke, J. Achiam, and P. Abbeel. Responsive safety in reinforcement learning by pid lagrangian methods. In *International Conference on Machine Learning*, pages 9133–9143. PMLR, 2020.
- [3] Y. As, I. Usmanova, S. Curi, and A. Krause. Constrained policy optimization via bayesian world models. In *International Conference on Learning Representations*, 2021.
- [4] Y. Hogewind, T. D. Simão, T. Kachman, and N. Jansen. Safe reinforcement learning from pixels using a stochastic latent representation. In *The Eleventh International Conference on Learning Representations*, 2022.
- [5] M. Wen and U. Topcu. Constrained cross-entropy method for safe reinforcement learning. *Advances in Neural Information Processing Systems*, 31, 2018.
- [6] H. Sikchi, W. Zhou, and D. Held. Learning off-policy with online planning. In *Conference on Robot Learning*, pages 1622–1633. PMLR, 2022.
- [7] B. Thananjeyan, A. Balakrishna, S. Nair, M. Luo, K. Srinivasan, M. Hwang, J. E. Gonzalez, J. Ibarz, C. Finn, and K. Goldberg. Recovery rl: Safe reinforcement learning with learned recovery zones. *IEEE Robotics and Automation Letters*, pages 4915–4922, 2021.
- [8] K. P. Wabersich and M. N. Zeilinger. A predictive safety filter for learning-based control of constrained nonlinear dynamical systems. *Automatica*, 129:109597, 2021.
- [9] J. Ji, J. Zhou, B. Zhang, J. Dai, X. Pan, R. Sun, W. Huang, Y. Geng, M. Liu, and Y. Yang. Omnisafe: An infrastructure for accelerating safe reinforcement learning research. *arXiv preprint arXiv:2305.09304*, 2023.
- [10] K. Chua, R. Calandra, R. McAllister, and S. Levine. Deep reinforcement learning in a handful of trials using probabilistic dynamics models. *Advances in neural information processing systems*, 31, 2018.
- [11] D. Hafner, T. Lillicrap, I. Fischer, R. Villegas, D. Ha, H. Lee, and J. Davidson. Learning latent dynamics for planning from pixels. In *International conference on machine learning*, pages 2555–2565. PMLR, 2019.
- [12] D. Hafner, T. Lillicrap, J. Ba, and M. Norouzi. Dream to control: Learning behaviors by latent imagination. In *International Conference on Learning Representations*, 2019.
- [13] P. Becker-Ehmck, M. Karl, J. Peters, and P. van der Smagt. Learning to fly via deep model-based reinforcement learning. *arXiv preprint arXiv:2003.08876*, 2020.
- [14] A. X. Lee, A. Nagabandi, P. Abbeel, and S. Levine. Stochastic latent actor-critic: Deep reinforcement learning with a latent variable model. *Advances in Neural Information Processing Systems*, 33:741–752, 2020.
- [15] A. G. Wilson and P. Izmailov. Bayesian deep learning and a probabilistic perspective of generalization. *Advances in neural information processing systems*, 33:4697–4708, 2020.
- [16] M. Janner, J. Fu, M. Zhang, and S. Levine. When to trust your model: Model-based policy optimization. *Advances in neural information processing systems*, 32, 2019.
- [17] N. A. Hansen, H. Su, and X. Wang. Temporal difference learning for model predictive control. In *International Conference on Machine Learning*, pages 8387–8406. PMLR, 2022.

- [18] K. Lowrey, A. Rajeswaran, S. Kakade, E. Todorov, and I. Mordatch. Plan online, learn offline: Efficient learning and exploration via model-based control. In *International Conference on Learning Representations*, 2018.
- [19] X. Chen, C. Wang, Z. Zhou, and K. W. Ross. Randomized ensembled double q-learning: Learning fast without a model. In *International Conference on Learning Representations*, 2020.
- [20] C. E. Luis, A. G. Bottero, J. Vinogradskaya, F. Berkenkamp, and J. Peters. Model-based uncertainty in value functions. In *International Conference on Artificial Intelligence and Statistics*, pages 8029–8052. PMLR, 2023.
- [21] K. Ghasemipour, S. S. Gu, and O. Nachum. Why so pessimistic? estimating uncertainties for offline rl through ensembles, and why their independence matters. *Advances in Neural Information Processing Systems*, 35:18267–18281, 2022.
- [22] T. Yu, G. Thomas, L. Yu, S. Ermon, J. Y. Zou, S. Levine, C. Finn, and T. Ma. Mopo: Model-based offline policy optimization. *Advances in Neural Information Processing Systems*, 33:14129–14142, 2020.
- [23] R. Kidambi, A. Rajeswaran, P. Netrapalli, and T. Joachims. Morel: Model-based offline reinforcement learning. *Advances in neural information processing systems*, 33:21810–21823, 2020.
- [24] S. Fujimoto, H. Hoof, and D. Meger. Addressing function approximation error in actor-critic methods. In *International conference on machine learning*, pages 1587–1596. PMLR, 2018.
- [25] T. Haarnoja, A. Zhou, P. Abbeel, and S. Levine. Soft actor-critic: Off-policy maximum entropy deep reinforcement learning with a stochastic actor. In *International conference on machine learning*, pages 1861–1870. PMLR, 2018.
- [26] J. Achiam, D. Held, A. Tamar, and P. Abbeel. Constrained policy optimization. In *International conference on machine learning*, pages 22–31. PMLR, 2017.
- [27] A. Ray, J. Achiam, and D. Amodei. Benchmarking safe exploration in deep reinforcement learning. *arXiv preprint arXiv:1910.01708*, 7(1):2, 2019.
- [28] S. Ha, P. Xu, Z. Tan, S. Levine, and J. Tan. Learning to walk in the real world with minimal human effort. *arXiv preprint arXiv:2002.08550*, 2020.
- [29] A. Sootla, A. I. Cowen-Rivers, T. Jafferjee, Z. Wang, D. H. Mguni, J. Wang, and H. Ammar. Sauté rl: Almost surely safe reinforcement learning using state augmentation. In *International Conference on Machine Learning*, pages 20423–20443. PMLR, 2022.
- [30] H. Bharadhwaj, A. Kumar, N. Rhinehart, S. Levine, F. Shkurti, and A. Garg. Conservative safety critics for exploration. In *International Conference on Learning Representations*, 2020.
- [31] H. Yu, W. Xu, and H. Zhang. Towards safe reinforcement learning with a safety editor policy. *Advances in Neural Information Processing Systems*, 35:2608–2621, 2022.
- [32] G. Dalal, K. Dvijotham, M. Vecerik, T. Hester, C. Paduraru, and Y. Tassa. Safe exploration in continuous action spaces. *arXiv preprint arXiv:1801.08757*, 2018.
- [33] R. Cheng, G. Orosz, R. M. Murray, and J. W. Burdick. End-to-end safe reinforcement learning through barrier functions for safety-critical continuous control tasks. In *Proceedings of the AAAI conference on artificial intelligence*, volume 33, pages 3387–3395, 2019.
- [34] N. C. Wagener, B. Boots, and C.-A. Cheng. Safe reinforcement learning using advantage-based intervention. In *International Conference on Machine Learning*, pages 10630–10640. PMLR, 2021.

399 [35] J. Ji, B. Zhang, J. Zhou, X. Pan, W. Huang, R. Sun, Y. Geng, Y. Zhong, J. Dai, and Y. Yang.  
400 Safety gymnasium: A unified safe reinforcement learning benchmark. *Advances in Neural*  
401 *Information Processing Systems*, 36, 2023.

## 402 A Ablation Studies

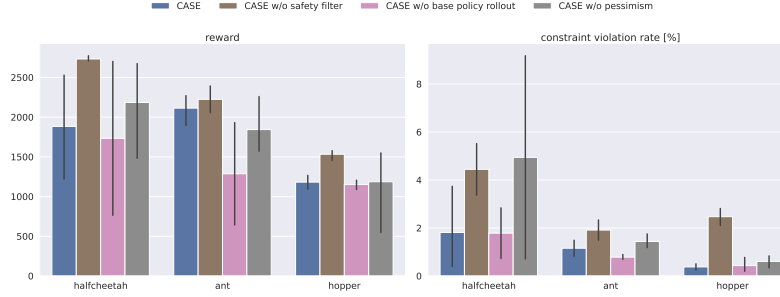

Figure 5: For ablating design choices in the safety filter. We evaluate the average rewards per episode in the last 10 evaluations (left) and the average percentage of steps with constraint violations in an episode during exploration (right). We first evaluate the role of the safety filter in CASE. Exploring with only  $\pi_\theta$  leads to a significant increase in constraint violations. Next, we evaluate the effect of the base policy rollouts. We see a decrease in the average rewards reached after exploration, especially in the ant environment. Finally, to evaluate the effect of pessimism in the filter, we optimize the filter by using the mean over the ensemble predictions instead of considering the worst-case ensemble prediction. Without pessimism, the filter tends to have higher constraint violation rates.

403 **Effect of safety filter** To assess the effect of the safety filter in our method, we explore CASE  
404 without the safety filter. In figure 5, we see that exploring solely using the constrained policy  $\pi_\theta$   
405 leads to higher constraint violation rates. This indicates the necessity of the filtering mechanism  
406 in our method. By looking at the maximum rewards reached after exploration in figure 5, we see  
407 that the increase in rewards after removing the safety filter is insignificant except in the halfcheetah  
408 environment, where the constraint violation rates more than double after removing the filter.

409 **Effect of base policy term in the filter objective** The filter objective in (8) includes rolling out  
410 the base policy  $\pi_\theta$  in the tail of the lookahead trajectory of the controller. We ablate this term by  
411 replacing it at the tail of the lookahead trajectory, thus maintaining a fixed total horizon length. This  
412 equates to the following objective

$$\min_{u_t \dots u_{t+H}} \mathbb{E}_{s_{t+1} \dots s_{t+H} \sim \mathcal{P}_\psi(\cdot | s_{t'}, u_{t'})} \left[ \sum_{t'=t}^{t+H} \mathcal{V}_{\max}^{\text{safe}}(s_{t'}) \right].$$

413 The purpose of the base-policy rollout is to inform the lookahead controller of the base policy’s  
414 behavior and thus steer the system towards regions of the state space where the base policy can  
415 perform without violating constraints. Removing the base policy rollouts leads to slightly worse  
416 task performance, especially in the ant environment. However, the difference in task performance  
417 is less significant than expected. In future work, exploring other possibilities for combining the  
418 intervention controller with a constrained base policy, such as penalizing the difference between the  
419 intervention mechanism’s actions and those of the base policy as done in [8], might be interesting.

420 **Effect of pessimism in the safety filter** In our safety filter design, we leverage a pessimistic loss  
421 to consider the effect of epistemic uncertainty during exploration. To study the effect of pessimism  
422 on the filter, we use the mean over the ensemble prediction constraint critic predictions  $\mathcal{V}_{\text{mean}}^{\text{safe}}$ , instead  
423 of using the maximum aggregation over the ensemble of the constraint critic predictions  $\mathcal{V}_{\max}^{\text{safe}}$ , intro-  
424 duced in section 3.2. We found that in our setup, removing the pessimism leads to higher constraint  
425 violation rates, especially in the more complex halfcheetah and ant environments.

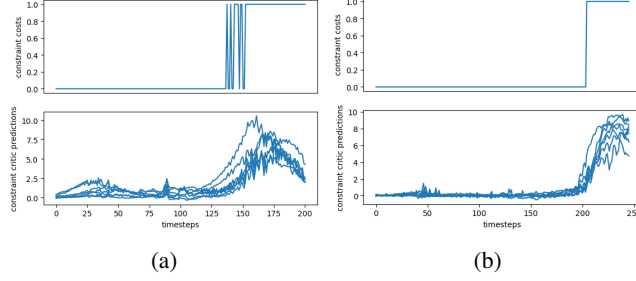

Figure 6: We compare the predictions of the constraint critic when including the terminal flag in its target calculation in 6a and excluding the terminal flag in 6b for two different episodes with early termination. The top row shows the ground truth constraint costs, and the bottom row shows the constraint critic predictions for each state in the episodes. In 6a, we see the effect of adding the termination flags in the targets, where the critic predicts a lower constraint cost near the terminal state. Excluding the terminal state flag leads the constraint critic in 6b to avoid this effect.

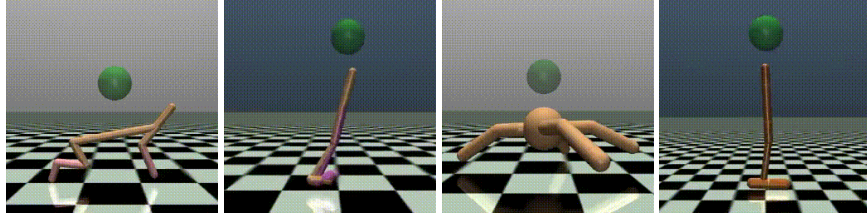

Figure 7: Constrained locomotion tasks from safety gymnasium [35]. The aim of the task is to maximise the locomotion reward, while staying below the maximum velocity

**Effect of Including Termination flag in Constraint Critic’s Targets** The constraint critic target described in (5) does not include the termination flag  $d_t$ . The termination flag is usually needed in environments with termination conditions, which assumes that terminating states are absorbing states. Including the termination flag in the task critic  $\mathcal{V}$  leads the critic to predict low values for such states, incentivizing the policy to avoid termination. This effect is not desired in the constraint critic  $\mathcal{V}^{\text{safe}}$  as it would lead the constraint critic to assign erroneous cost-to-gos to states near the termination states, which would have an adverse effect on the safety filter and the constrained policy optimization. We compare the predictions of two constraint critics in figure 6. The first in figure 6a is trained using targets including the termination flag  $d_t$

$$C^{\lambda,i}(s_t) = \mathcal{I}_t + \gamma^{\text{safe}}(1 - d_t) \left( (1 - \lambda^{\text{safe}})v_{\xi,i}^{\text{safe}}(s_t) + \lambda^{\text{safe}}C^{\lambda,i}(s_{t+1}) \right) \quad \text{where,}$$

$$C^{\lambda,i}(s_{t+H_v}) = v_{\xi,i}^{\text{safe}}(s_{t+H_v}).$$

The second in figure 6b is trained with the targets described in (8). We find that including  $d_t$  in  $\text{TD}(\lambda)$  returns has a negative effect on the constraint critic predictions where the critic assigns much lower values to states near the termination state, despite constraint violations.

## B Experimental Setup Details

### B.1 Benchmark

We use the constrained velocity tasks from safety gymnasium [35] in our experiments. Specifically, we use the half cheetah, hopper, walker, and ant tasks, shown in figure 7. These tasks are attractive as they pose conflicting objectives, where the task reward incentivizes the agent to move with high velocity with the correct pose, and the constraint cost punishes the agent for moving above a velocity limit.

## 445 B.2 Hyperparameters

446 Our method involves hyperparameters for the model training, the CMBAC, and the safety filtering.  
 447 We list our hyperparameters in table 1.

|                                                                                                          | HalfCheetah | Hopper    | Ant | Walker |
|----------------------------------------------------------------------------------------------------------|-------------|-----------|-----|--------|
| <b>Model <math>\mathcal{P}_\psi</math></b>                                                               |             |           |     |        |
| number of bootstraps $B$                                                                                 |             | 7         |     |        |
| learning rate                                                                                            |             | $1e^{-3}$ |     |        |
| activation                                                                                               |             | softsign  |     |        |
| number of hidden layers                                                                                  |             | 4         |     |        |
| number of hidden units                                                                                   |             | 200       |     |        |
| <b>Critic <math>\mathcal{V}_\phi</math> and safety critic <math>\mathcal{V}_\xi^{\text{safe}}</math></b> |             |           |     |        |
| Horizon                                                                                                  |             | 12        |     |        |
| Activation                                                                                               |             | softsign  |     |        |
| TD $\lambda$                                                                                             |             | 0.9       |     |        |
| discount $\gamma$                                                                                        |             | 0.99      |     |        |
| safety critic discount $\gamma^{\text{safe}}$                                                            |             | 0.9       |     |        |
| safety TD $\lambda^{\text{safe}}$                                                                        |             | 0.75      |     |        |
| number of hidden layers                                                                                  |             | 2         |     |        |
| number of hidden units                                                                                   |             | 256       |     |        |
| <b>Policy <math>\pi_\theta</math></b>                                                                    |             |           |     |        |
| Horizon                                                                                                  |             | 4         |     |        |
| Activation                                                                                               |             | ReLU      |     |        |
| learning rate                                                                                            |             | $5e^{-4}$ |     |        |
| number of hidden layers                                                                                  |             | 2         |     |        |
| number of hidden units                                                                                   |             | 256       |     |        |
| Polyak factor                                                                                            |             | 0.995     |     |        |
| Learning step lagrangian multipliers                                                                     |             | $3e^{-4}$ |     |        |
| <b>Filter</b>                                                                                            |             |           |     |        |
| Filter Horizon                                                                                           |             | 5         |     |        |
| number optimization steps                                                                                |             | 50        |     |        |
| learning rate                                                                                            |             | $1e^{-1}$ |     |        |
| $\epsilon^{\text{safe}}$                                                                                 | 0.5         | 0.5       | 0.5 | 2.5    |

Table 1: Hyperparameters for CASE
